# Supplementary material for: Secondary Treatment for Men with Localized Prostate Cancer: A Pooled Analysis of PRIAS and ERSPC-Rotterdam Data within the PIONEER Data Platform
Source: MDPI journal article supplement (doi:10.3390/jpm12050751), 2022-05-05
Supplement: s1 [file s1]

Supplementary Figure S1: Cumulative Incidence of RP

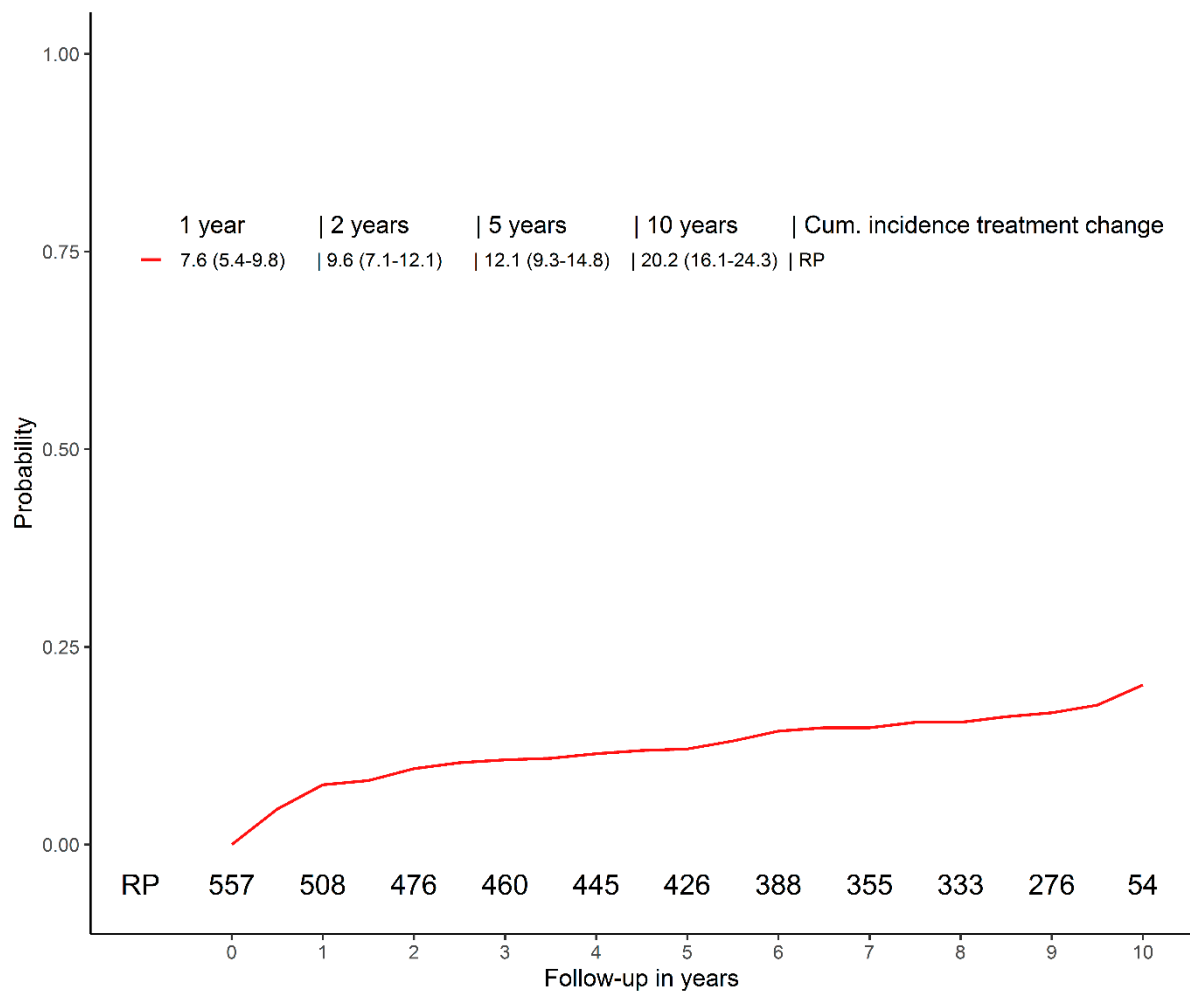

Supplementary Figure S2: Cumulative Incidence of RT

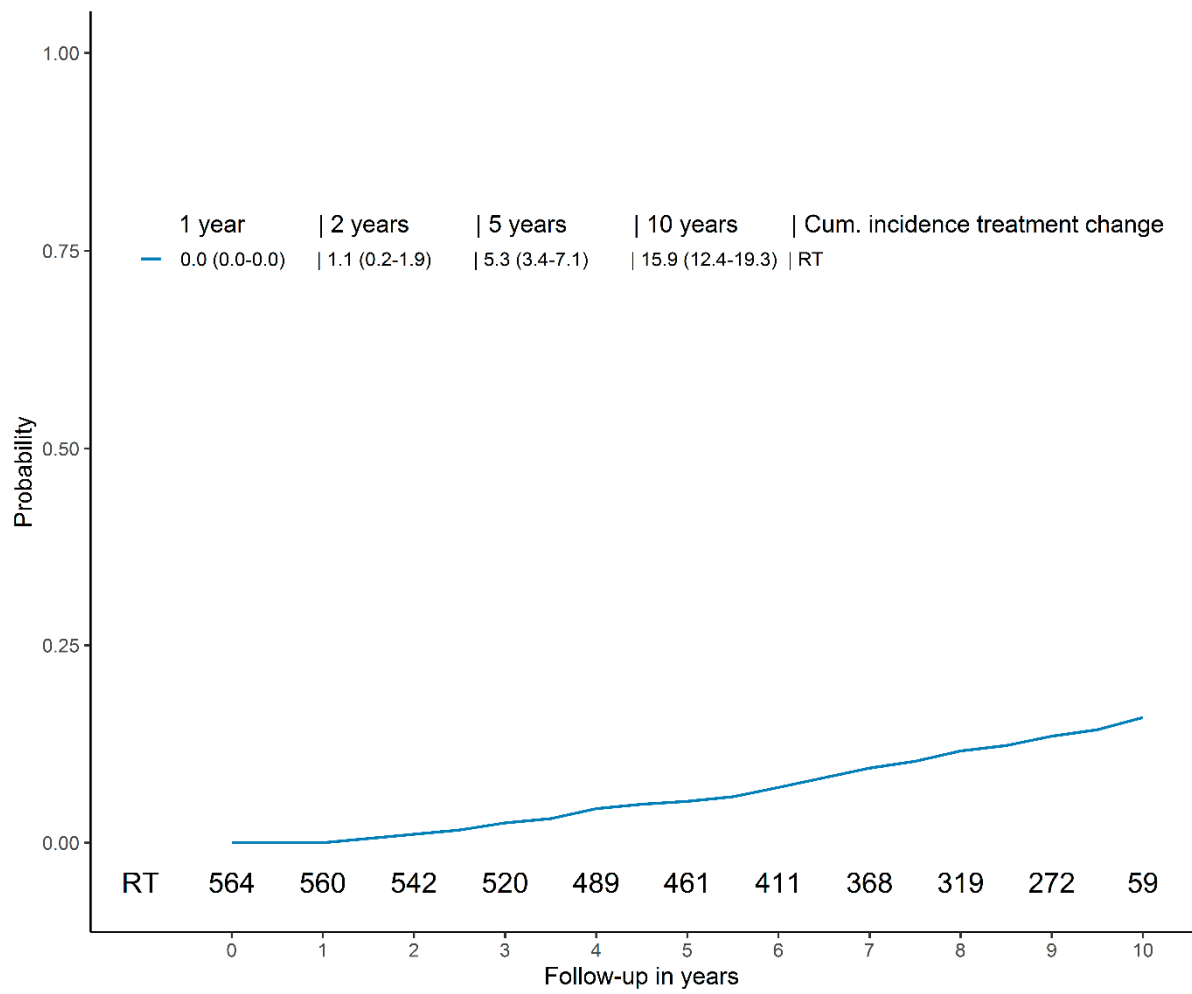

Supplementary Figure S3: Cumulative Incidence of AS

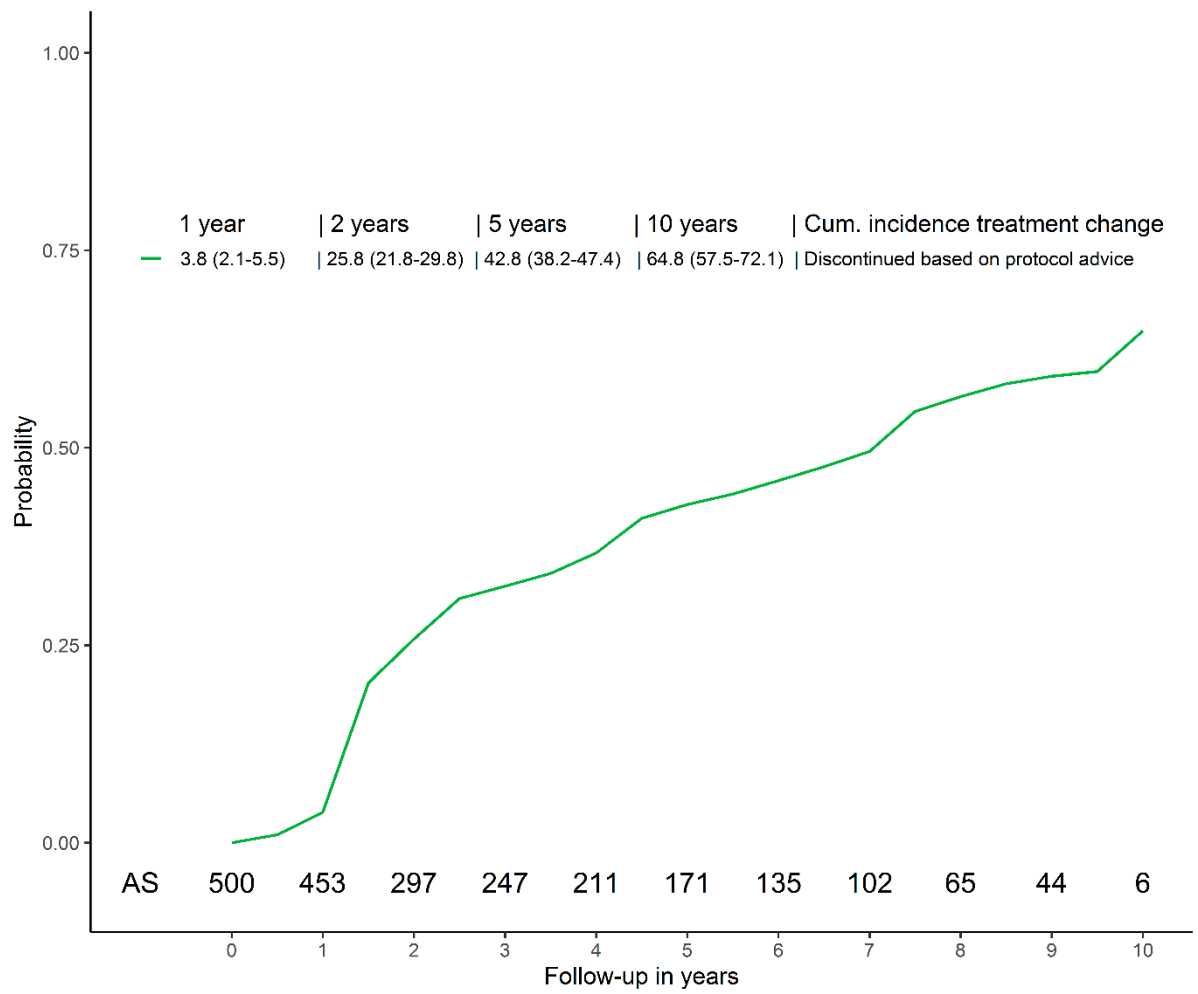

Supplementary Figure S4: Cumulative Incidence of AS after discontinuation of AS

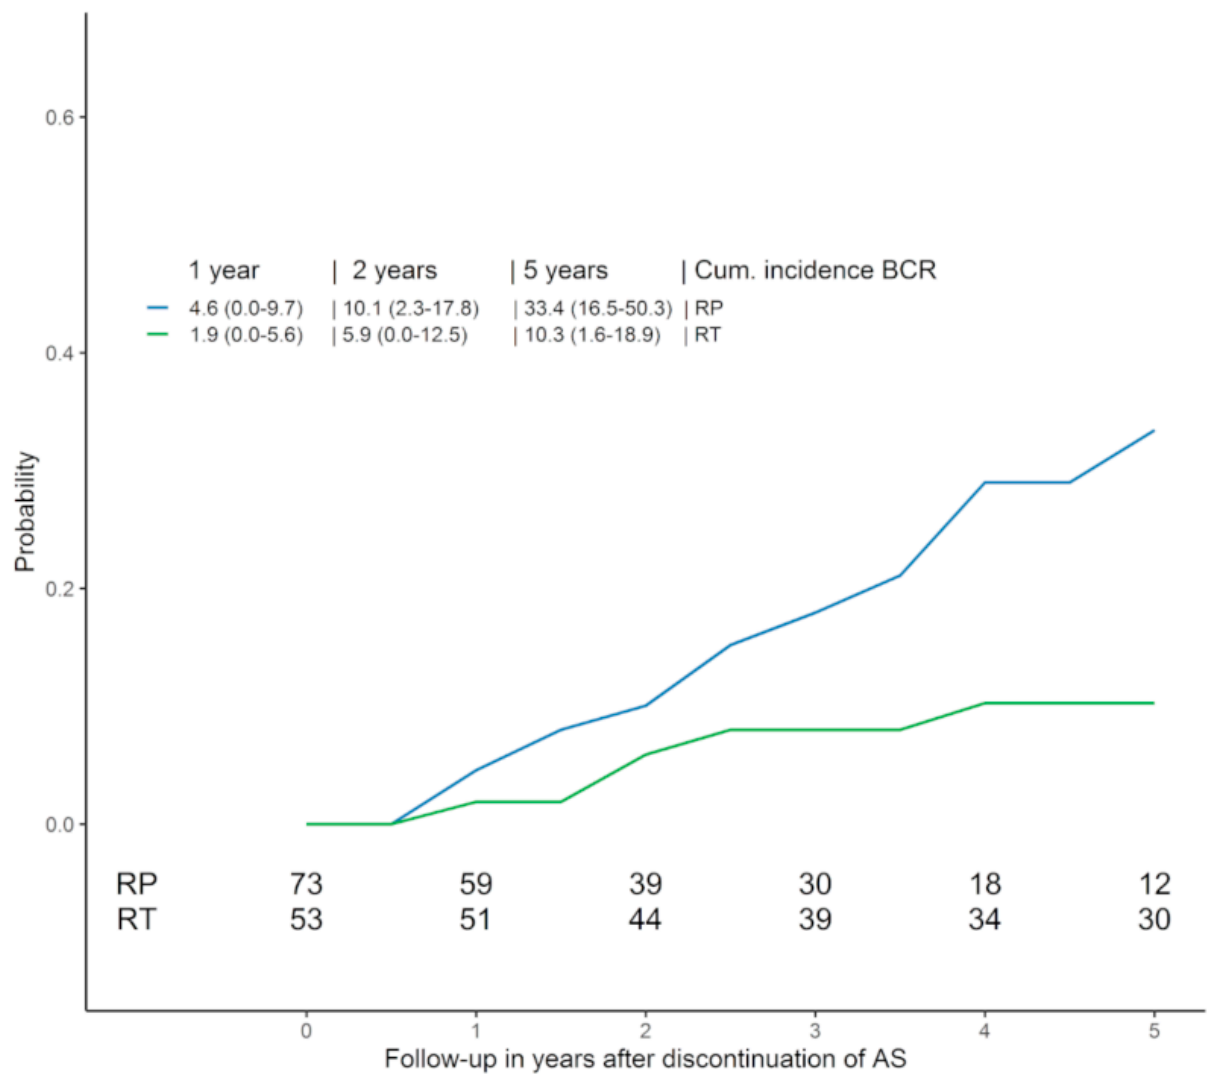

## PIONEER

E. Smith; J. N'Dow; K. Plass; M. Ribal; N. Mottet; R. Shepherd; L. Moris; M. Lardas; T. Van den Broeck; P-P M. Willemse; N. Fossati; K. H. Pang; R. Campi; I. Greco; M. Gacci; S. Serni; A. Bjartell; S. Evans-Axelsson; R. Lonnerbro; A. Briganti; D. Crosti; M. Meoni; R. Garzonio; G. Gandaglia; C. Bangma; M. Roobol; S. Remmers; D. Tilki; A. Auvinen; T. Murtola; T. Visakorpi; K. Talala; T. Tammela; A. Siltari; M. Van Hemelrijck; K. Beyer; S. Lejeune; S. Caputova; S. Byrne; L. Fialho; A. Cardone; P. Gono; M. De Vetter; I. Panagiotopoulou; F. Ugolini; A. Rodriguez; B. De Meulder; C. Auffray; I.-A. Balaur; N. Taibi; A. Thouvenin; A. Hijazy; S. Power; N. Zounemat Kermani; K. van Bochove; M. Moinat; M. Kalafati; C. Bernini; D. Horgan; L. Fullwood; M. Holtorf; D. Lancet; G. Bernstein; M. I. Omar; S. MacLennan; S. MacLennan; S. Tripathi; M. Wirth; M. Froehner; B. Brenner; A. Borkowetz; C. Thomas; F. Horn; K. Reiche; M. Kreuz; A. Josefsson; D. Gasi Tandefelt; J. Hugosson; J. Schalken; H. Huisman; T. Hofmarcher; P. Lindgren; E. Andersson; A. Fridhammar; A. Asiimwe; F. Verholen; J. Zong; J.-E. Butler-Ransohoff; T. Williamson; K. Chandrawansa; R. Waldeck; A. Bruno; R. Herrera; E. Nevedomskaya; S. Fatoba; N. Constantinovici; A. Mohamed; C. Steinbeißer; S. Kedhagae; M. Maass; P. Torremante; S. Evans-Axelsson; E. Dochy; F. Pisa; M. D. Voss; Z. Devecseri; T. Abbott; A. Kiran; C. Dau; K. Papineni; J. Wang-Silvanto; R. Snijder; V. Doyé; X. Wang; A. Garnham; M. Lambrecht; R. Wolfinger; S. Rogiers; L. Antoni; A. Servan; K. Pascoe; P. Robinson; B. Jatou; D. Bakkard; H. Turunen; O. Kilkku; P. Pohjanjousi; O. Voima; L. Nevalaita; K. Punakivi; C. Reich; S. Ratwani; E. Longden-Chapman; D. Burke; M. Licour; M. Ang; S. Payne; A. Yong; F. Lujan; S. Le Mare; J. Hendrich; B. Franks; M. Bussmann; I. Köhler; G. Juckeland; D. Kotik.

## ERSPC Rotterdam study group

W.J. Kirkels; J.B.W. Rietbergen, I.W. van der Cruisen, R. Raaijmakers, S.H. de Vries, S. Roemeling, C. Gosselaar, T. Wolters, R.C.N. van den Bergh, P.J. van Leeuwen, M. Bul, X. Zhu, H.A. van Vugt, L.P. Bokhorst, A.R. Alberts, F.-J. Drost, J.F.M. Verbeek, D.F. Osses, H. Luiting, S. Remmers, R. Hogenhout, J.W. Salman, L.D.F. Venderbos, G. Yurdakul, A. Boeken-Kruger, C. Wijburg, M. Forouzanfar, M. de Boer, R. Postma, A.N. Vis, R. Hoedemaeker, G.J.L.H. van Leenders, B. Blijenberg, P.J. van der Maas, S. Otto, G. Draisma, P. Beemsterboer, M. Essink-Bot, I. Korfage, R. Boer, M. Wildhagen, W. Merkelbach, W. Hoekstra, J. Blom, R.A.M. Damhuis, A. Reedijk, R. Kranse, D.W. Roobol, W. Roobol, E. van den Berg, G.-J. de Zwart, C.G.A.M. Franken-Raab, M. van Slooten-Midderig, A. Smit, V. van der Drift, E. de Bilde, L. Mani, M. Visser-van Dongen, H. Versteeg-Leenheer, B. Zoutendijk, N. Vink, H. van Meurs, A. E. de Bruijn.

## PRIAS

F.M. Bentvelsen; J. Jaspars; E. Planken; A. Bendiksby; Olav Andreas Hopland; V. Berge; T. Habuchi; R.M. Potjer; R. Raaijmakers; W.M. Stomps; J.J. Vis; P.A. Wertheimer; A.G.M. Zeegers; G. Smits; P.J. van den Broeke; D. van der Schoot; H. Jansen; J. van Brakel; K. Zaccari; M. Tijnagel; I. van Onna; E.H.G.M. Oomens; P.J. Posthumus; M. Schuit; E. van Muilekom; H.G. van der Poel; A. Kahnameli; A. Briede; H. Lau; T. Pickles; C. Rikken; I. Cordia; M. Kummeling; R. van den Bergh; D. Duijvesz; D.M. Somford; H. Vergunst; E.L. Koldewijn; P.E.F. Stijns; W. Scheepens; A. Villers; J. Fonseca; O. Capoun; S. Sakamoto; R. Gregoir; B. Guillonnet; K. van Dalen; R. Spermon; A. Jungwirth; W. Boellaard; J. Boormans; M.B. Busstra; B. Weening; C.H. Bangma; F.H. Drost; S. van den Heuvel; K. de Mooij; W.J. Kirkels; L.P. Bokhorst; M. Bul; M. van Mierlo; P.C.M.S. Verhagen; M.J. Roobol; W. Roobol; N. Azevedo; F. Sanguedolce; P.P. Perez; M. Maffezzini; M. Kortleve; A. Viddeleer; M. Eto; K. Suzuki; M.

Kiewiet de Jonge; F. Froeling; T. Sugiyama Shiga; C. Arsov; D. Caasen-Findeisen; R. Rabenalt; H. Krueger; J. Schmitges; J. Teishima; S. Maruyama; C.A. Becerra; P.F. Martinez; W. Villamil; J. M. Caballero Giné; R. Bastus; E.R. Barselo; M. Montesino; A.S. Rannikko; B. Rikken; W. Obara; H.P. Beerlage; J.R. Oddens; R.A. Schipper; H. Sasaki; Y. Takehi; H. Kinoshita; A. Gayler; M. Schiffer; J. Winkle; T.A. Ozkan; N. Schmeller; S. Aaltomaa; A. Terai; M. Multanen Kyorin; O. Ukimura; T. Inoue; A. Yokomizo; C.D. Vera Donoso; J.M. Alapont-Alacreu; M. Martinez-Sarmiento; C. de Castro; M. Roeleveld; R. Pelger; A.M. Reicherz; K.H. Tully; N. Atassi Stroelin; R. Sosnowski; M. Schotman; J. Verlind; T. Roeleveld; S.D. Bos; E. Alleman; M. Asselman; B. Santerse; H. Leenknecht; M. Pit; S. Khoe; N. Hendolin; N. Terada; T. Hakariya; H. Okuno; L.W. Tim; Y. Kitamura; Y. Tomita; M. Nakayama; M. Uemura; P. Hellström; F. Staerman; G. Rodemer; C.F. Ng; P. Chiu; C. Nitz; S. Laabs; N. Bosch; S. Saito; Y. Sakai; H. Kitamura; T. Tsukamoto; M. Leskinen; K. Hashine; A. Paganelli; A. Lapini; E. Trenti; M. Roscigno; M. Tanello; F. Badenchini; T. Magnani; M.F. Alvisi; T. Rancati; L. Pasini; M. Gallucci; O. Caffo; G. Cicchetti; G. Conti; R. Sanseverino; P. Ditunno; G. Martorana; V. Altieri; A. Geboers; A. Noordzij; S. Tenbreul; A. Sonneveld; P.L.M. Vijverberg; I. van den Berg; J. Blom; E.R. Boevé; R. Nooter; J. Rietbergen; S. de Vries; I. van den Berg; H. Wilkens; J.W. Langeveld; A. E. Treijer; T. Anagnostou; M. Gillich; J. Hanske; T. Tammela; Y. Naya; E. Bruijnes; E. Hoogendijk; F. van der Windt; B. Zeijlemaker; K. Kawashima; N. Kamiya; K. Mitsuka; T. Nomoto; T. Fukumori; K. Akakura; Y. Maeda; B. Wijsman; I. van Oort; C. Hoeks; R. Lazarov; P. Papavassilis; A. Semjonow; W. Oosterlinck; N. Mottet; F.G. Veiga; A. Bjartell; J.S. Uribe; H. Fukuhara; M. Nakamura; T. Keul; J. Trunk; C. Hawke; M. Rice; M. Rice; D. Gyomber; N. Lawrentschuk; L. Dodds; L. Johns-Putra; H. Fan Chan; F. Macneil; M. Louie-Johnsun; P. Anderson; K. Rantall; P. Kearns; P. Ruljancich; A. Jayathillake; C. Chemasle; Q. King; S. La Bianca; D. Murphy; M.J. Monsour; A. Vega Vega; C. Smiles; D. Malouf; J. Grummet; M. Patel; V. Chalasani; N. Awad; P. Rashid; S. Brough; A. Tan; M. de Bruin-Titulaer; A. N. Vis; I. Hara; M. Leter; N. Tsuchiya; H. Matsuyama; H. Matsumoto; Soe Fung Kon Jin; A.Q.H.J. Niemer; E.B. Cornel; G. Molijn; S.P. Stomps; J. Beck; S. van Selm; T. Willems; P. de Vries; R. Bosshardt.
